# Supplementary material for: Hemodynamic Effects of Anti-Vascular Endothelial Growth Factor Injections on Optical Coherence Tomography Angiography in Diabetic Macular Edema Eyes
Source: PubMed Central journal article supplement — Transl Vis Sci Technol. 2022 Oct 3;11(10):5. doi: 10.1167/tvst.11.10.5 (PMC9547366; doi:10.1167/tvst.11.10.5), 2022-10-03
Supplement: tvst-11-10-5_s001.pdf [file tvst-11-10-5_s001.pdf]

**Supplemental Table: Pearson Correlation Coefficient Analysis of the Relationship Between OCTA Parameters and Potential Confounding Variables**

| Possible Confounding Variables | AFI Full | AFI SCP | AFI MCP | AFI DCP | VD Full | VD SCP  | VD MCP | VD DCP  | VLD SCP | FAZ     |
|--------------------------------|----------|---------|---------|---------|---------|---------|--------|---------|---------|---------|
| Age (years)                    | 0.117    | 0.097   | 0.125   | -0.058  | 0.204   | 0.081   | 0.285  | 0.173   | -0.111  | 0.06    |
| Days between Follow-up         | -0.157   | -0.211  | -0.166  | -0.127  | -0.169  | -0.287  | -0.033 | -0.153  | -0.247  | 0.06    |
| Signal Strength Index (SSI)    | 0.21     | 0.143   | 0.246   | -0.047  | 0.379   | 0.42*   | -0.313 | 0.514** | 0.428*  | 0.533** |
| Q-Score                        | 0.589**  | 0.537** | 0.633** | -0.181  | 0.513** | 0.552** | -0.312 | 0.614** | 0.231   | 0.309   |
| Central Foveal Thickness (CFT) | 0.458*   | 0.431*  | 0.436*  | -0.357  | 0.403*  | 0.382   | 0.147  | 0.237   | 0.007   | -0.54** |
| Number of Prior Injections     | 0.005    | 0.004   | 0.042   | 0.185   | -0.237  | -0.373  | 0.142  | 0.022   | -0.423* | 0.186   |

\*Correlation is significant at the 0.05 level (2-tailed). \*\*Correlation is significant at the 0.01 level (2-tailed)

Abbreviations: **AFI**= adjusted flow index, **SCP**= superficial capillary plexus, **MCP**= middle capillary plexus, **DCP**= deep capillary plexus, **VD**= vessel density, **VLD**= skeletonized vessel length density, **FAZ**= foveal avascular zone
